# Supplementary material for: Peptidyl Transferase Center and the Emergence of the Translation System
Source: Life (Basel). 2017 Apr 25;7(2):21. doi: 10.3390/life7020021 (PMC5492143; doi:10.3390/life7020021)
Supplement: Supplementary file 1 [file life-07-00021-s001.pdf]

# Supplementary Martials: Peptidyl Transferase Center and the Emergence of the Translation System

Savio Torres de Farias, Thais Gaudêncio Rêgo and Marco V. José

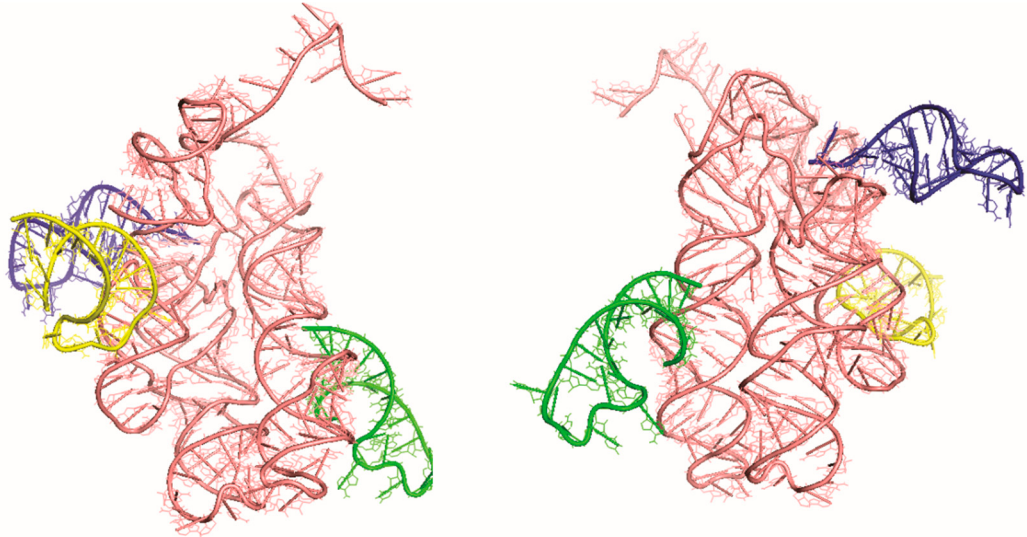

**Figure 1.** Two different perspectives of the superimposition of the docking experiments between the *T. thermophilus* Peptidyl Transferase Center (PTC) (salmon) and tRNA<sup>Gly</sup> (blue), tRNA<sup>Arg</sup> (green), and tRNA<sup>Asp</sup> (yellow) anticodon loop, with rotation of 180 degrees between them.
